1 Role of ERK activation in *H. pylori*-induced disruption of cell-cell tight junctions.

2 Amita Sekar<sup>1</sup>, and Bow Ho<sup>1,2,\*</sup>

3 <sup>1</sup>Department of Microbiology and Immunology, National University of Singapore, Singapore

4 117545

5 <sup>2</sup>Department of Food Science & Technology, Faculty of Science, National University of

6 Singapore 117546

7 \*Corresponding author: E-mail: [michob@gmail.com](mailto:michob@gmail.com) Phone: +65 65163092

8 Running title: *H. pylori*-induced tight junction disruption

## 9 **Abstract**

### 10 Background

11 Tight junctions, a network of claudins and other proteins, play an important role in  
12 maintaining barrier function and para-cellular permeability. *H. pylori*, the major etiological  
13 agent of various gastroduodenal diseases, is known to cause tight junction disruption.  
14 However, the molecular events that triggered cell-cell tight junction disruption in *H. pylori*-  
15 infected cells, remain largely elusive.

### 16 Materials and Methods

17 Trans-epithelial electrical resistance (TEER) and FITC-Dextran permeability measurement  
18 were performed to determine the barrier function in *H. pylori* 88-3887-infected polarized  
19 MKN28 cells. For visualization of tight junction protein localization, immunofluorescence  
20 and immunoblotting techniques were used. To examine the role of ERK activation in tight  
21 junction disruption, U0126, a MEK inhibitor, was employed. To further support the study,

22 computational analyses of *H. pylori*-infected primary gastric cells were carried out to  
23 decipher the transcriptomic changes.

## 24 Results

25 The epithelial barrier of polarized MKN28 cells when infected with *H. pylori* displayed  
26 disruption of cell-cell junctions as shown by TEER & FITC-dextran permeability tests.  
27 Claudin-4 was shown to delocalize from host cytoplasm to nucleus in *H. pylori*-infected cells.  
28 In contrast, delocalization of claudin-4 was minimized when ERK activation was inhibited.  
29 Interestingly, transcriptomic analyses revealed the upregulation of genes associated with cell-  
30 junction assembly and ERK pathway forming a dense interacting network of proteins.

## 31 Conclusion

32 Taken together, evidence from this study indicates that *H. pylori* regulates ERK pathway  
33 triggering cell-cell junction disruption, contributing to host pathogenesis. It indicates the vital  
34 role of ERK in regulating key events associated with the development of *H. pylori*-induced  
35 gastroduodenal diseases.

## 36 Introduction

37 Gastric mucosal barrier, which is composed of thick mucus layer and polarized  
38 epithelial cells, confers protection to the inner layers of the stomach from the hostile acidic  
39 environment<sup>[1][2]</sup>. Despite being a single layer of epithelial cells, it provides a sturdy wall  
40 against the highly corrosive contents of the gut, maintaining homeostasis. Polarized gastric  
41 epithelial cells harbour distinct domains of which the lateral domains comprise cell-cell  
42 junctions and account for establishing cell-cell contact and cell adhesion to the extracellular  
43 matrix<sup>[3]</sup>. Cell-cell tight junctions found at the apical side are responsible for the tight  
44 packaging of the cells and maintaining paracellular permeability. Tight junctions are



45 composed of transmembrane proteins such as Junction Adhesion Molecule (JAM),  
46 Occludins, Claudins and cytoplasmic connector protein Zona Occludens (ZO-1). Together,  
47 these proteins are closely associated to form a tight junction assembly<sup>[4]</sup> that maintain the cell  
48 barrier integrity.

49 Focussed research on claudins from the time of its discovery in 1998 has garnered  
50 mounting evidence that these junction proteins form the primary physical basis of tight  
51 junction assembly<sup>[5]</sup>. The homophilic and heterophilic interactions among different claudins  
52 as well as its association with the other components of tight junction complex is pivotal in  
53 ensuring proper functioning of the cell-cell tight junctions<sup>[6]</sup>. Till date, 27 claudins have been  
54 reported and they have been found in tissue specific combinations thereby conferring tissue-  
55 specific barrier properties<sup>[9]</sup>. Phosphorylation of claudins has been reported to play a vital role  
56 in paracellular permeability. Various kinases like myosin light chain kinase (MLCK) and  
57 protein kinase A (PKA) have been shown to be involved in the phosphorylation of  
58 claudins<sup>[10]</sup>.

59 Kwon (2013) observed aberrant expression of cell-junction associated proteins in  
60 clinically isolated tumour samples<sup>[11]</sup>. Similarly, moderate to high staining of claudin-4 was  
61 correlated to decreased survival in gastric adenocarcinoma tissues suggesting a strong link  
62 between expression of tight junction proteins and cancer<sup>[12]</sup>. The altered expression and  
63 localization of another tight junction protein, ZO-1, was observed in metastatic pancreatic  
64 ductal adenocarcinoma tissue<sup>[13]</sup>. In contrast, reduced expression of several claudins has also  
65 been closely linked to tumorigenesis. Claudin-1 and -7 have been found to be deregulated in  
66 breast carcinoma while downregulation of claudin-4 was observed in hepatocellular  
67 carcinoma<sup>[9]</sup>. These studies highlight the importance of expression and localization of cell-  
68 junction protein in maintaining host cell integrity. Substantial evidence has thus led us to

69 consider cell junction proteins as potential biomarkers in various disease conditions, mostly  
70 in cancer.

71 Tight junction disruption has been reported to be caused by various microbes. In the  
72 course of pathogen infection, inflammation and other host responses have also shown to  
73 cause internalization of claudins which has a direct effect on the host cell homeostasis.  
74 Bacteria such as *Listeria monocytogenes*, *Campylobacter jejuni* and *Escherichia coli* have  
75 been shown to invade the host causing tight junction disruptions<sup>[14][15][16]</sup>. However, the  
76 mechanism by which these pathogens affect the cell-cell junction proteins to cause a  
77 physiological imbalance in host cells remains largely elusive.

78 *Helicobacter pylori*, an extensively studied gram negative gut pathogen has been  
79 highly associated with various gastro-duodenal diseases including gastric cancer<sup>[17][18]</sup>. More  
80 than half of the world's population are infected with this gut bacterium<sup>[19]</sup>. The bacterium  
81 harbors an array of virulence factors which aid in colonization of the gut. Bacterial proteins  
82 such as cytotoxin associated gene A (CagA) and vacuolating cytotoxin A (VacA) have been  
83 determined to be of high importance in *H. pylori* pathogenesis<sup>[20]</sup>. *H. pylori* has been  
84 reported to translocate CagA via the type IV secretion system (T4SS) into the host cells  
85 triggering events such as IL-8 induction, cytoskeletal rearrangement and many other host  
86 responses<sup>[21][22]</sup>. Intriguingly, the CagA-T4SS system was found to interact with basolateral  
87 integrins to translocate the virulence factor into the host<sup>[23][24]</sup>. These findings have led to  
88 speculate that *H. pylori* could induce cell-cell junction disruption prior to accessing the  
89 basolateral integrins in order to translocate CagA into the host<sup>[25]</sup>. In 2003, Ameiva *et al*  
90 observed that CagA could play a role in recruiting ZO-1 to the sites of bacterial attachment  
91 and cause cytoskeletal rearrangement<sup>[26]</sup>. Factors such as high temperature requirement A  
92 (HtrA) have been reported to aid in *H. pylori*-induced cell junction disruption<sup>[27]</sup>. In other  
93 studies, *H. pylori* urease has been implicated in causing tight junction disruption by targeting

94 claudin-4 and -5<sup>[28][29]</sup>. Even though strong evidence suggests the involvement of *H. pylori* in  
95 tight junction disruption, the exact mechanism by which the bacterium induces tight junction  
96 disruption remains unclear.

97 ERK is a major transcription factor involved in the expression of many crucial  
98 proteins determining the fate of host cell. *H. pylori* has been shown to activate ERK  
99 triggering many host response pathways<sup>[30][31][32][33][34]</sup>. Several reports have strongly  
100 implicated the role of activated ERK in regulating cell junction proteins, particularly  
101 claudins, and in disrupting cell-cell barrier function. Wang *et al.*, (2004) demonstrated that  
102 activation of ERK1/2-MAPK pathway was found to disrupt tight junctions in human corneal  
103 epithelial cells<sup>[35]</sup>. Interestingly, Aggarwal *et al* in 2011 reported that knockdown of ERK1/2  
104 enhanced tight junction integrity while U0126 (ERK kinase inhibitor) attenuated the  
105 disruption initiated by the activation of EGFR<sup>[36]</sup>. In contrast, Ray *et al* in 2007 revealed that  
106 MEK1/ERK is highly associated with maintaining cell-cell contacts<sup>[37]</sup>. A recent published  
107 study observed that inhibition of ERK signaling pathway decreased the expression of claudin-  
108 2 in lung adenocarcinoma cells<sup>[38]</sup> and similar results were also observed in Madin-Darby  
109 Canine Kidney cells (MDCK) I and II cells<sup>[39]</sup>. Although several studies have explored the  
110 role of *H. pylori*-induced ERK activation, there is a knowledge gap regarding its effect on  
111 tight junction proteins and barrier function disruption.

112 Our study aims to deduce the role of ERK activation in *H. pylori*-induced barrier  
113 function disruption. We present data showing the role of *H. pylori*-induced ERK activation in  
114 delocalizing claudin-4 from the tight junctions leading to the disruption of barrier function in  
115 MKN28 cells. This study also provides supporting data from transcriptomic analysis of *H.*  
116 *pylori*-infected primary cells showing significant regulation of tight junction and ERK  
117 signalling related gene expression.

118 **Methods**

119 *Bacterial and in vitro cell cultures*

120 *H. pylori* 88-3887 strain was used in this study. Bacteria were grown in 5% chocolate blood  
121 agar plates at 37°C in a 10% CO<sub>2</sub> incubator (Forma Scientific, USA) for two days before  
122 being harvested and suspended in phosphate buffered saline (PBS). A standard curve was  
123 generated based on the relationship between the optical density readings of bacterial  
124 suspensions and bacterial count using plate count.

125 Polarized MKN28 cells were used as the study model as these cells have been shown to form  
126 intact cell-cell junctions<sup>[29]</sup>. The cells were cultured and maintained in RPMI 1640 with 2.05  
127 mM L-glutamine (HyClone, USA) supplemented with 10% Fetal Bovine Serum (HyClone,  
128 USA) and incubated at 37°C in a 5% CO<sub>2</sub> incubator (Forma Scientific, USA). The polarized  
129 cells were grown to above 90% confluency to ensure formation of intact cell junctions.

130 *Materials*

131 FITC-Dextran- 4kDa used in permeability assay was purchased from Sigma-Aldrich,  
132 USA. Mouse monoclonal anti-Claudin-4 (1:100, Novex, Life Technologies, USA) and rabbit  
133 polyclonal anti-claudin-4 (1:1000, Santa Cruz Biotechnology, USA) were used in  
134 immunofluorescence and immunoblotting experiments respectively. Rabbit polyclonal anti-  
135 *H. pylori* (1:250) was from Dako, Denmark and mouse monoclonal anti- *H. pylori* (1:250)  
136 was from Thermo Scientific, USA. Mouse monoclonal Beta-actin (1:3000) from Cell  
137 Signalling Technologies, USA was used as marker for whole cell protein immunoblotting  
138 experiments. Rabbit polyclonal p-cadherin (1:1000, Santa Cruz Biotechnology, USA), Rabbit  
139 polyclonal beta-tubulin (1:1000, Cell Signalling Technologies, USA) and Rabbit polyclonal  
140 anti-Lamin A/C (1:1000, Cell Signalling Technologies, USA) were used as markers for

141 membrane, cytoplasmic and nuclear protein respectively. ERK activation was assessed using  
142 rabbit polyclonal anti-p-ERK (1:500, Cell Signalling Technologies, USA). Polyclonal goat  
143 anti-mouse IgG/HRP and Polyclonal goat anti-rabbit IgG/HRP (1:2000) were from Dako,  
144 Denmark. Fluorescent conjugated secondary antibodies Cy3 goat anti-mouse IgG (H+L)  
145 (1:100), Cy3 goat anti-rabbit IgG (H+L) (1:100), Alexafluor 488 F(ab')<sub>2</sub> fragment of goat  
146 anti-rabbit IgG (H+L) (1:100) and Alexafluor 488 goat anti-mouse IgG (H+L) (1:100) were  
147 all purchased from ThermoFisher Scientific, USA. U0126 (MEK inhibitor) was purchased  
148 from Cell Signaling Technologies, USA. For the inhibitor study, the cells were treated with  
149 10uM U0126 (Tocris Biosciences, UK).

#### 150 *Infection study*

151 The confluent cells were infected with *H. pylori* 88-3887 at a multiplicity of infection  
152 (MOI) of 100:1. The cells were then incubated at 37°C in a 5% CO<sub>2</sub> incubator for 24 hrs or  
153 various time points as required for the experiment. Post infection, the cells were washed 3  
154 times with 1x PBS prior to any further downstream processing.

#### 155 *Immunofluorescence studies*

156 Cells were cultured on sterilized coverslips placed in 6-well plates (Greiner Bio-One,  
157 Austria) containing culture medium RPMI 1640 for 3-4 days. The confluent cells were  
158 treated with inhibitor and/or infected with *H. pylori* while uninfected cells served as control.  
159 At the required time points, the cover slips containing the cells were withdrawn and washed  
160 twice with 1 x PBS before being fixed using 3.7% formaldehyde. Following this, the cells  
161 were permeabilized using 3.7% formaldehyde and 0.02% Triton X-100 (Sigma-Aldrich,  
162 USA). Blocking was carried out with 2% Bovine Serum Albumin (BSA) (Sigma-Aldrich,  
163 USA) for 2 hours, prior to incubating with primary antibodies at 4°C overnight. The cells  
164 were then washed thrice with 1 x PBS for 5 mins each prior to incubating with fluorescent

165 conjugated secondary antibodies for 2 hours at room temperature. The coverslips containing  
166 the immuno-stained cells were washed thrice with 1 x PBS then mounted onto glass slides  
167 using mounting media with DAPI (Vector Laboratories, Inc., USA). The stained cells were  
168 viewed using confocal laser scanning microscopy (CLSM) (Olympus FV3000, Japan).

169 3D image reconstruction: z-stack images were taken using CLSM and these images were  
170 loaded onto Imaris software (version 7.6, Bitplane) for reconstructing the images in a 3D  
171 plane. These images were used to analyse the delocalization of claudin-4 from the apical  
172 membrane.

### 173 *Transepithelial electrical resistance (TEER) measurement*

174 Cells were cultured in 12-well plate hanging inserts (Greiner Bio-One, Austria) for 3-  
175 4 days to reach > 90% confluency. TEER readings were measured using the electrode  
176 supplied along with the MilliCell-ERS volt-ohm meter (Merck, USA). A blank insert with  
177 media alone was used as a negative control. MKN28 cells with TEER reading > 350  $\Omega \cdot \text{cm}^2$   
178 was considered optimal for the barrier function studies. TEER readings were measured for  
179 cells subjected to inhibitor treatment and/or infected with *H. pylori*. Uninfected cells served  
180 as control. The % baseline resistance was calculated using the following equation and the  
181 values were plotted as a graph. All experiments were performed in triplicates.

$$182 \quad \text{\% Baseline Resistance} = \frac{[\text{Sample Resistance} - \text{Blank Resistance}]}{[\text{Baseline Resistance} - \text{Blank Resistance}]} \times 100$$

183

### 184 *FITC-Dextran permeability assay*

185 MKN28 cells were cultured for 3-4 days to confluency in 12-well inserts and  
186 subjected to inhibitor treatment and/or infection with *H. pylori*. Uninfected cells served as  
187 control. The cells were washed twice with 1 x PBS before adding FITC-Dextran (1mg/ml) to

188 the upper chamber. The FITC-Dextran that diffused into the basal chamber media was  
189 determined by measuring the fluorescence intensity at optical density 492nm (Tecan Infinite,  
190 Switzerland). All experiments were performed in triplicates.

#### 191 *Protein extraction and western blot studies*

192 Post infection cells were lysed using Triton-X 100 containing lysis buffer to extract  
193 whole cell proteins. Membrane and cytoplasmic protein fractions of cells infected with *H.*  
194 *pylori* for 24 hours were extracted using ProteoJet™ Membrane Protein extraction kit  
195 (Fermentas, Thermo Scientific, USA) according to the manufacturer's protocol. Cytoplasmic  
196 and nuclear fractions were separated using NE-PER™ Nuclear and Cytoplasmic Extraction  
197 Reagents (Thermo Scientific, USA). The protein concentration of samples were estimated  
198 using Bradford Assay (Bio Rad, USA) and an equivalent of 15ug protein was loaded onto  
199 12% SDS- Poly Acrylamide gel and subjected to protein electrophoresis. The samples were  
200 then electro-blotted onto PVDF membrane by wet transfer method. The membranes were  
201 blocked with 2% BSA prior to incubating with primary antibodies at 4°C overnight. The  
202 membranes were then washed thoroughly with 1xPBS with 0.1% Tween- 20 (Sigma-Aldrich,  
203 USA) for 5 times of 5 mins each. The membranes were then incubated with HRP-conjugated  
204 secondary antibodies for 2 hours at room temperature. After thorough washing (5 x 5 mins),  
205 the membranes were developed using Pierce ECL western blotting substrate (Thermo  
206 Scientific, USA) and the bands were documented using ChemiDoc™ MP System (Bio-Rad  
207 Laboratories, USA).

#### 208 *q-PCR studies*

209 RNA was extracted from infected and uninfected cells using RNeasy Mini kit  
210 (Qiagen, USA) and quantitated spectrophotometrically. Specific primers for claudin-4  
211 [Forward primer 5'-TGGGAGGGCTATGGATGAA-3', Reverse Primer 5'-

212 GCTTTCATCCTCCAGGCAGT-3'] and endogenous control GAPDH [Forward primer 5'-  
213 ATCTCCCCTCCTCACAGTTG-3', Reverse Primer 5'-TGGTTGAGCACAGGGTACTT-  
214 3'] were synthesized by Sigma-Aldrich, USA. These primers were used to amplify the  
215 mRNA from the sample using Quantifast SyBR Green one –step RT-PCR kit (Qiagen,  
216 Netherlands) and the reactions were run using ABI 7500 real-time PCR instrument (Thermo  
217 Scientific, USA). The experiment was performed in triplicates and the relative quantitation  
218 values were analysed using 7500 software v2.0.6 (Thermo Scientific, USA) and represented  
219 as a graph.

## 220 *Bioinformatic analysis*

221 Published RNA-Seq raw data of *H. pylori*-infected gastric primary cells were used for  
222 downstream analysis (Accession number: GSE55699)<sup>[40]</sup>. The published libraries were  
223 downloaded from Gene Expression Omnibus<sup>[41]</sup>.

224 The fastq format raw reads were subjected to quality control analysis using FASTQC  
225 (<http://www.bioinformatics.babraham.ac.uk/projects/fastqc/>). The sequencing files were  
226 considered to be of high quality when the following parameters were observed: (Mean  
227 Quality score-30 and above, Adapter contamination level- Below 0.01%, Duplication level-  
228 Below 80%, %A ~%T, %G~%C).

229 Mapping of the RNA-Seq libraries was performed using the splicing-aware STAR  
230 2.4. The software ensured trimming of unmappable and low quality sequences. Reads with  
231 more than 2 mismatches and reads that map to more than one locus in the genome were  
232 filtered out. The mapped files were imported into SeqMonk 0.31.0  
233 (<http://www.bioinformatics.babraham.ac.uk/projects/seqmonk/>) and the replicates and sample  
234 groups were assigned appropriately. Mapping QC was performed using “RNA-Seq QC Plot”  
235 option. Differential gene expression analysis was carried out using the in-built EdgeR



236 statistics module<sup>[42]</sup>. Mapped files were then normalized using the log10 (RPKM)  
237 transformation option in RNA-Seq quantitation pipeline module. Heatmaps of the significant  
238 genes were generated using the “Per-probe normalized Hierarchical Clustering” option. Gene  
239 Ontology terms file (.bgo) and the human gene ontology annotation file were downloaded  
240 from the gene ontology consortium website (<http://geneontology.org/>). These files were  
241 imported to BiNGO<sup>[43]</sup> application which is installed in Cytoscape 3.2.0<sup>[44]</sup>. List of significant  
242 genes was uploaded to BiNGO to identify the enriched biological processes. Gene lists of  
243 relevant biological processes were uploaded to STRING (<http://string-db.org/>) protein-protein  
244 interaction database<sup>[45]</sup>. The text mining option was disabled. The interaction network was  
245 downloaded in text format. The text file was uploaded to Cytoscape 3.2.0 for visualization.

#### 246 *Statistical analysis*

247 Student t-test (2-tailed, paired end) was used to calculate the p-value and determine statistical  
248 significance.

249

## 250 **Results**

251 *H. pylori* affects barrier function and impairs the localization of claudin-4 in MKN28 cells.

252 Cell-cell junctions confer epithelial barrier function and play a critical role in  
253 permeability. Epithelial barrier function of polarized MKN28 cells were determined using  
254 Trans-epithelial electrical resistance (TEER) measurement and FITC-Dextran permeability  
255 assay. TEER readings taken 24 hours post-*H. pylori* infection were found to be significantly  
256 reduced (p-value = 0.009050856) in *H. pylori*-infected cells when compared to the uninfected  
257 control (Fig. 1A, left panel). Similarly, permeability of 4kDa FITC-Dextran was found to be  
258 higher in *H. pylori*-infected cells compared to uninfected cells (Fig. 1A, right panel). The

259 study demonstrates *H. pylori*-induced barrier function disruption in *H. pylori*-infected  
260 MKN28 cells using these two techniques.

261 In order to visualize the localization of claudin-4 in *H. pylori*-infected and uninfected  
262 cells, confocal laser scanning microscopy (CLSM) imaging was used. Within 24 hours of  
263 apical exposure of MKN28 cells to *H. pylori*, delocalization of claudin-4 from the cell-cell  
264 tight junctions was observed when compared to uninfected cells. Fig. 1B shows 3D  
265 reconstruction of the z-stack images of both *H. pylori*-infected and uninfected cells. The 3D  
266 images clearly display delocalization of claudin-4 from the tight junctions. *H. pylori*-infected  
267 cells showed cytoplasmic and peri-nuclear staining of claudin-4 whereas the uninfected cells  
268 showed localization of these proteins at the cell-cell junctions marking clear boundaries  
269 between cells (Fig. 1B).

270 To further support the finding that *H. pylori* affects the localization of claudin-4,  
271 western blot analysis was employed to examine the expression of claudin-4 in the membrane,  
272 cytoplasmic and nuclear protein fractions. The result shows an increased cytoplasmic and  
273 nuclear expression of claudin-4 suggesting delocalization of these proteins from cell-cell  
274 junction in *H. pylori*-infected cells. Furthermore, the membrane claudin-4 expression in *H.*  
275 *pylori*-infected cells was found to be reduced when compared to uninfected cells affirming  
276 the delocalization of claudin-4 (Fig. 1C).

277 We next examined the overall protein and mRNA expression of claudin-4 of  
278 uninfected cells and *H. pylori*-infected cells using western blot analysis and qPCR studies.  
279 We found that the protein expression did not differ between *H. pylori*-infected cells and  
280 uninfected cells at various time points studied (Fig. 1D, upper panel). Similarly, mRNA  
281 expression of claudin-4 in *H. pylori*-infected and uninfected cells did not differ (Fig. 1D,

282 lower panel). The results indicate that *H. pylori* induced delocalization of claudin-4 is not  
283 dependant on the expression level.

#### 284 *Inhibition of ERK activation minimized H. pylori-induced delocalization of claudin-4*

285 It was reported that during *H. pylori* infection, increased levels of EGF-related  
286 peptides and NOD1 dependant mechanisms activate ERK<sup>[34]</sup>. Wang *et al* in 2004  
287 demonstrated that ERK activation triggered barrier function disruption in human corneal  
288 epithelial cells<sup>[35]</sup>. We therefore proceeded to investigate whether inhibition of ERK  
289 activation using MEK inhibitor (U0126) would alter the process of *H. pylori*-induced barrier  
290 function disruption. Results show increased epithelial resistance (TEER) was detected in  
291 U0126-treated *H. pylori*-infected cells as compared to infected cells without inhibitor  
292 treatment (p-value = 0.003098682) (Fig. 2A, left panel). Interestingly, uninfected cells with  
293 or without inhibitor treatment showed similar TEER values. Furthermore, there was reduced  
294 permeability of 4kDa FITC-Dextran in *H. pylori*-infected cells with U0126 treatment as  
295 compared to infected cells without inhibitor treatment (Fig. 2A, right panel). The results show  
296 that upon the inhibition of *H. pylori*-induced ERK activation, the host epithelial barrier  
297 function is normalized. The data suggest that *H. pylori*-induced ERK activation has an  
298 important role in regulating epithelial barrier function in MKN28 cells supporting the  
299 findings of Wang *et al* (2004) demonstrated in corneal epithelial cells<sup>[35]</sup>.

300 CLSM was used to further investigate the role of *H. pylori*-activated ERK in  
301 delocalizing claudin-4 in support of the TEER and FITC-Dextran results. Immuno staining of  
302 *H. pylori*-infected MKN28 cells treated with ERK activation inhibitor (U0126) showed  
303 minimized redistribution of claudin-4 when compared with *H. pylori*-infected cells without  
304 inhibitor treatment (Fig. 2B). More interestingly, western blots demonstrated that the

305 redistribution of claudin-4 from membrane to cytoplasm and nucleus was clearly reduced in  
306 U0126-treated *H. pylori*-infected cells (Fig.2C).

307 *Transcriptomic changes induced by H. pylori infection leads to cell junction disruption*

308 Our findings have thus demonstrated that *H. pylori* (infection?) plays an essential role  
309 in the disruption of epithelial barrier function with the involvement of ERK activation. In  
310 order to further elucidate the role of *H. pylori* in regulating signalling pathways and induce  
311 cell-cell junction disruption, RNA-Seq analysis was performed on *H. pylori*-infected primary  
312 gastric epithelial cells.

313 In this study, quality control analysis of the downloaded libraries was executed and  
314 the output showed that the mean quality score of the reads is ~37 indicating high quality  
315 sequencing<sup>[40]</sup>. Following which, mapping of the raw reads was accomplished. The  
316 percentage of uniquely mapped reads was ~92% with over 90% of those reads mapped to  
317 exons. This indicates the reliability of the libraries for further downstream analyses.  
318 Subsequently, differential gene expression analysis revealed that 8472 genes were  
319 significantly regulated in *H. pylori*-infected cells. Of these, 3665 genes were found to be  
320 upregulated while 4807 were downregulated (Fig. 3A). Further to this, the differential  
321 regulated genes as shown in Fig. 3B, were found to include interleukin-8 (IL8) and matrix  
322 metalloproteinase 10 (MMP10). These two genes have previously been shown to be  
323 upregulated in response to *H. pylori* infection<sup>[46][47]</sup> further supporting the credibility of the  
324 differential gene expression analysis. The scatter plot also shows the upregulation of the  
325 genes that are associated with tight junction assembly and host signalling pathway (CLDN18,  
326 MAP2K1 and NFKB1A) (Fig. 3B).

327 The scaled Reads Per Kilobase Million (RPKM) values of all the significantly  
328 regulated genes were visualized across the replicates using a hierarchical clustered heatmap.

329 Among the significantly upregulated genes (cutoff p-value = <0.05), we found many genes  
330 which are closely associated with tight junction assembly as well as MAPK cascade  
331 indicating that both the processes are heavily affected in *H. pylori*-infected cells. The  
332 heatmap also demonstrated similar expression profile among the replicates of each condition  
333 (Fig. 3C). Additionally, gene ontology analysis of *H. pylori* upregulated genes shows  
334 enrichment of cell junction assembly and MAPK cascade regulation processes. This has  
335 provided more evidence suggesting the role of *H. pylori* in the regulation of these two  
336 processes. Other processes such as response to bacterial proteins and inflammation were also  
337 observed to be enriched (Fig. 3D).

338 The upregulated genes associated with cell junction assembly and MAPK cascade  
339 were further subjected to protein-protein interaction analysis using STRING database and  
340 visualized using Cytoscape 3.2.0. Most astoundingly, the network reveals a strong protein-  
341 protein interaction among the upregulated genes involved in both the indicated biological  
342 processes forming an extremely tight network (Fig. 3.E). This result highly suggests the  
343 extent of gene regulation exerted by *H. pylori* on host cells where the bacterium induces  
344 disruption of cell-cell junction disruption via activation of MAPK/ERK associated pathways.

## 345 Discussion

346 Cell-cell tight junctions, being at the apical surface, constitute an important protective  
347 barrier which when compromised can lead to a multitude of deleterious effects on the host.  
348 Thus, the proteins that are responsible for forming the tight junction assembly could be  
349 crucial targets for pathogens to initiate pathogenesis. Claudins, one of the two major tight  
350 junction protein complex, are highly expressed in gastric tissue and has been shown to have  
351 aberrant expression and localization in cancer conditions<sup>[48]</sup>. It has also been reported to be a  
352 multifunctional protein with many roles in cell migration, cell signalling and barrier

353 maintenance<sup>[49]</sup>. In the event of infection and inflammation, internalization of claudins could  
354 lead to deleterious effects on the cell<sup>[8]</sup>. A recent study has shown that claudin-4 was over-  
355 expressed in 71% of 192 gastric cancer cases studied<sup>[50]</sup>. The importance of claudin-4 in  
356 normal function of gastric mucosal barrier should not be overlooked. Our study examines the  
357 course of claudins (in particular claudin-4) during *H. pylori* infection.

358 In this study, polarized MKN28 cells were used thanks to the organized cell-cell  
359 junctions<sup>[29]</sup>. The deleterious effect of *H. pylori* on disrupting the barrier function of MKN28  
360 cells was shown by, the significant reduction in the TEER measurements and a concomitant  
361 increase in FITC-Dextran permeability in *H. pylori*-infected cells. Our findings strongly  
362 suggest that *H. pylori* induces delocalization of claudin-4 via activated ERK pathway leading  
363 to the loss of barrier function of the cell-cell tight junctions. The results support earlier  
364 reports that *H. pylori* impairs barrier function during pathogenesis<sup>[29][51][52]</sup>.

365 Our initial data suggest that claudin-4 is redistributed from the cell-cell tight junctions  
366 into the cytoplasm. This is in agreement with several earlier reports that suggested the  
367 delocalization of tight junction proteins as a marker for transformed cells<sup>[9][11]</sup>. But, Fedwick  
368 *et al.*, (2005) reported that *H. pylori* SS1-infected non-transformed polarized SCBN cells  
369 showed both the disruption of cell-cell junction and the reduction of the total protein level of  
370 claudin-4 and -5<sup>[28]</sup>. In order to visualize the effect of *H. pylori* on host claudin-4, we used  
371 immunofluorescence imaging which clearly show the delocalization of claudin-4 from cell-  
372 cell tight junctions to the cytoplasm and nucleus in *H. pylori*-infected cells. Furthermore,  
373 there was no obvious display of diminished staining-density of claudin-4 (Fig. 1B). Our  
374 confocal finding is further supported by western blot analysis and qPCR data (Fig. 1D) that  
375 revealed the overall level of expression of claudin-4 did not alter. Furthermore, western blot  
376 analysis (Fig. 1C) showed an increase of claudin-4, an apically expressed protein, in the  
377 cytoplasmic fraction but a decrease in the membrane fraction in *H. pylori*-infected cells.

378 Additionally, the expression of claudin-4 in the nuclear fraction was also found to increase in  
379 *H. pylori*-infected cells as compared to uninfected cells. Taken together, the findings in this  
380 study affirm that there is delocalization but not reduction in claudins in *H. pylori*-infected  
381 cells as reported earlier<sup>[28][53]</sup>.

382 Activated ERK pathway has been reported to play a major role in inducing various  
383 host responses during pathogenesis<sup>[33][34]</sup>. Studies have reported that during *H. pylori*  
384 infection, increased levels of EGF and other related proteins have been shown to activate the  
385 EGFR pathway, signalling a cascade of events thereafter<sup>[54]</sup>. Of interest are recent reports that  
386 suggested activated ERK molecules have a role in epithelial barrier dysfunction<sup>[35][55]</sup>. By  
387 inhibiting ERK activation using U0126 in *H. pylori*-infected cells, there was significant  
388 reduction in the delocalization of claudin-4 (Fig.2B). Similarly, redistribution of claudin-4  
389 into the cytoplasmic and nuclear region was reduced as compared to *H. pylori*-infected cells  
390 treated with U0126 (Fig.2C). Furthermore, the cell-cell barrier function in MKN28 cells was  
391 found to be maintained in cells treated with U0126 prior to infection (Fig.2A). It is therefore  
392 opportune to implicate that the activated ERK plays a role in delocalizing claudin-4 as a host  
393 response to *H. pylori* infection.

394 Our computational analysis demonstrated that *H. pylori* triggers the differential  
395 expression of many crucial genes including IL8 and MMP10 (Fig.3B) which is in agreement  
396 with the earlier reports that indicated these genes were regulated by *H. pylori*<sup>[46][47]</sup>. In  
397 addition to that, our RNA-Seq analysis revealed the upregulation of a large number of genes  
398 associated with MAPK cascade (Fig.3C). This is congruent with an earlier report that  
399 demonstrated the activation of MAPK cascade in *H. pylori*-infected cells, in a dose dependent  
400 manner<sup>[56]</sup>. However, our study is the first to report the extent by which *H. pylori* regulates  
401 the genes associated with the activation of MAPK cascade and cell junction assembly.  
402 Interactome analysis reveals that the upregulated MAPK cascade and cell junction genes

403 interact closely with each other forming a tight and strong network (Fig. 3E). This asserts that  
404 the regulation of cell junction assembly by *H. pylori* could potentially be associated to the  
405 activation of MAPK cascade. This study reveals for the first time that *H. pylori*-activated  
406 ERK/MAPK cascade plays a significant role in disrupting cell-cell junctions in gastric  
407 epithelial cells.

408         This study has provided evidence suggesting *H. pylori*-activated ERK pathway plays  
409 a direct role in redistributing claudin-4 from the tight junctions resulting in compromising  
410 host barrier integrity. Interestingly, the transcriptomic analyses also revealed a wealth of  
411 information on the strong interactions at the molecular level between tight junction proteins  
412 and ERK signalling proteins. However, further analyses involving the genome binding  
413 occupancy profiling of transcription factors that are upregulated in *H. pylori*- infected cells  
414 are required to decipher the molecular mechanism by which *H. pylori* causes tight junction  
415 disruption via ERK activation.

416

#### 417 **Conflict of interest**

418 Authors declare no conflict of interest.

#### 419 **References**

- 420 1. Forssell H. Gastric mucosal defence mechanisms: a brief review. *Scand J*  
421 *Gastroenterol Suppl* .1988;155:23-28.
- 422 2. Niv Y, Banić M. Gastric barrier function and toxic damage. *Dig Dis*. 2014;32:235-  
423 242.



- 424 3. Chiba H, Osanai M, Murata M, Kojima T, Sawada N. Transmembrane proteins of  
425 tight junctions. *Biochim Biophys Acta*. 2008; 1778: 588-600.
- 426 4. Ebnet K. Organization of multiprotein complexes at cell-cell junctions. *Histochem*  
427 *Cell Biol*. 2008;130:1-20.
- 428 5. Tsukita S, Furuse M. Occludin and claudins in tight-junction strands: leading or  
429 supporting players? *Trends Cell Biol*. 1999;9:268-273.
- 430 6. Krause G, Protze J, Piontek J. Assembly and function of claudins: Structure-function  
431 relationships based on homology models and crystal structures. *Semin Cell Dev Biol*.  
432 2015;42:3-12.
- 433 7. Veshnyakova A, Protze J, Rossa J, Blasig IE, Krause G, Piontek J On the interaction  
434 of *Clostridium perfringens* enterotoxin with claudins. *Toxins (Basel)*. 2010;2:1336-  
435 1356.
- 436 8. Findley MK, Koval M. Regulation and roles for claudin-family tight junction  
437 proteins. *IUBMB Life*. 2009;61:431-437.
- 438 9. Tsukita S, Tanaka H, Tamura A. The claudins: from tight junctions to biological  
439 systems. *Trends Biochem Sci*. 2019;44:141-152.
- 440
- 441 10. Shen L, Black ED, Witkowski ED, et al. Myosin light chain phosphorylation regulates  
442 barrier function by remodeling tight junction structure. *J Cell Sci* 2006;119:2095-  
443 2106.
- 444
- 445 11. Kwon MJ. Emerging roles of claudins in human cancer. *Int J Mol Sci* 2013;14:18148-  
446 18180.

- 447 12. Resnick MB, Gavilanez M, Newton E, et al. Claudin expression in gastric  
448 adenocarcinomas: a tissue microarray study with prognostic correlation. *Hum Pathol.*  
449 2005;36:886-892.
- 450 13. Kleeff J, Shi X, Bode HP, et al. Altered expression and localization of the tight  
451 junction protein ZO-1 in primary and metastatic pancreatic cancer. *Pancreas.*  
452 2001;23:259-265.
- 453 14. Hanajima-Ozawa M, Matsuzawa T, Fukui A, et al. Enteropathogenic *Escherichia*  
454 *coli*, *Shigella flexneri*, and *Listeria monocytogenes* recruit a junctional protein, zonula  
455 occludens-1, to actin tails and pedestals. *Infect Immun.* 2007;75:565-573.
- 456 15. Lamb-Rosteski JM, Kalischuk LD, Inglis GD, Buret AG. Epidermal growth factor  
457 inhibits *Campylobacter jejuni*-induced claudin-4 disruption, loss of epithelial barrier  
458 function, and *Escherichia coli* translocation. *Infect Immun.* 2008;76:3390-3398.
- 459 16. Zhang Q, Li Q, Wang C, Li N, Li J. Redistribution of tight junction proteins during  
460 EPEC infection in vivo. *Inflammation.* 2012;35:23-32.
- 461 17. Graham DY. History of *Helicobacter pylori*, duodenal ulcer, gastric ulcer and gastric  
462 cancer. *World J Gastroenterol.* 2014;20:5191-5204.
- 463 18. Sokic-Milutinovic A, Alempijevic T, Milosavljevic T. Role of *Helicobacter pylori*  
464 infection in gastric carcinogenesis: Current knowledge and future directions. *World J*  
465 *Gastroenterol.* 2015;21:11654-11672.
- 466 19. Kusters JG, van Vliet AH, Kuipers EJ. Pathogenesis of *Helicobacter pylori* infection.  
467 *Clin Microbiol Rev.* 2006;19:449-490.

- 468 20. da Costa DM, Pereira Edos S, Rabenhorst SH. What exists beyond cagA and vacA?  
469 *Helicobacter pylori* genes in gastric diseases. *World J Gastroenterol.* 2015;21:10563-  
470 10572.
- 471 21. Backert S, Ziska E, Brinkmann V, et al. Translocation of the *Helicobacter pylori*  
472 CagA protein in gastric epithelial cells by a type IV secretion apparatus. *Cell*  
473 *Microbiol.* 2000;2:155-164.
- 474 22. Hatakeyama M. SagA of CagA in *Helicobacter pylori* pathogenesis. *Curr Opin*  
475 *Microbiol.* 2008;11:30-37.
- 476 23. Kwok T, Zabler D, Urman S, et al. Helicobacter exploits integrin for type IV secretion  
477 and kinase activation. *Nature.* 2007;449:862-866.
- 478 24. Jiménez-Soto LF, Kutter S, Sewald X, et al. *Helicobacter pylori* type IV secretion  
479 apparatus exploits beta1 integrin in a novel RGD-independent manner. *PLoS Pathog.*  
480 2009;5:e1000684.
- 481 25. Wessler S, Backert S. Molecular mechanisms of epithelial-barrier disruption by  
482 *Helicobacter pylori*. *Trends Microbiol.* 2008;16:397-405.
- 483 26. Amieva MR, Vogelmann R, Covacci A, Tompkins LS, Nelson WJ, Falkow S.  
484 Disruption of the epithelial apical-junctional complex by *Helicobacter pylori* CagA.  
485 *Science.* 2003;300:1430-1434.
- 486 27. Hoy B, Löwer M, Weydig C, et al. *Helicobacter pylori* HtrA is a new secreted  
487 virulence factor that cleaves E-cadherin to disrupt intercellular adhesion. *EMBO Rep.*  
488 2010; 11:798-804.

- 489 28. Fedwick JP, Lapointe TK, Meddings JB, Sherman PM, Buret AG. *Helicobacter pylori*  
490 activates myosin light-chain kinase to disrupt claudin-4 and claudin-5 and increase  
491 epithelial permeability. *Infect Immun.* 2005;73:7844-7852.
- 492 29. Caron TJ, Scott KE, Fox JG, Hagen SJ. Tight junction disruption: *Helicobacter pylori*  
493 and dysregulation of the gastric mucosal barrier. *World J Gastroenterol.*  
494 2015;21:11411-11427.
- 495 30. Meyer-ter-Vehn T, Covacci A, Kist M, Pahl HL. *Helicobacter pylori* activates  
496 mitogen-activated protein kinase cascades and induces expression of the proto-  
497 oncogenes c-fos and c-jun. *J Biol Chem.* 2000;275:16064-16072.
- 498 31. Subhash VV, Ho B. Inflammation and proliferation - a causal event of host response  
499 to *Helicobacter pylori* infection. *Microbiology.* 2015;161:1150-1160.
- 500 32. Asim M, Chaturvedi R, Hoge S, et al. *Helicobacter pylori* induces ERK-dependent  
501 formation of a phospho-c-Fos c-Jun activator protein-1 complex that causes apoptosis  
502 in macrophages. *J Biol Chem.* 2010;285:20343-20357.
- 503 33. Seo JH, Lim JW, Kim H. Differential Role of ERK and p38 on NF- $\kappa$ B Activation in  
504 *Helicobacter pylori*-Infected Gastric Epithelial Cells. *J Cancer Prev.* 2013;18:346-  
505 350.
- 506 34. Allison CC, Kufer TA, Kremmer E, Kaparakis M, Ferrero RL. *Helicobacter pylori*  
507 induces MAPK phosphorylation and AP-1 activation via a NOD1-dependent  
508 mechanism. *J Immunol.* 2009;183:8099-8109.
- 509 35. Wang Y, Zhang J, Yi XJ, Yu FS. Activation of ERK1/2 MAP kinase pathway  
510 induces tight junction disruption in human corneal epithelial cells. *Exp Eye Res.*  
511 2004;78:125-136.

- 512 36. Aggarwal S, Suzuki T, Taylor WL, Bhargava A, Rao RK. Contrasting effects of ERK  
513 on tight junction integrity in differentiated and under-differentiated Caco-2 cell  
514 monolayers. *Biochem J.* 2011;433:51-63.
- 515 37. Ray RM, Vaidya RJ, Johnson LR. MEK/ERK regulates adherens junctions and  
516 migration through Rac1. *Cell Motil Cytoskeleton.* 2007;64:143-156.
- 517 38. Ikari A, Sato T, Watanabe R, Yamazaki Y, Sugatani J. Increase in claudin-2  
518 expression by an EGFR/MEK/ERK/c-Fos pathway in lung adenocarcinoma A549  
519 cells. *Biochim Biophys Acta.* 2012;1823:1110-1118.
- 520 39. Lipschutz JH, Li S, Arisco A, Balkovetz DF. Extracellular signal-regulated kinases  
521 1/2 control claudin-2 expression in Madin-Darby canine kidney strain I and II cells. *J*  
522 *Biol Chem.* 2005;280:3780-3788.
- 523 40. Koeppel M, Garcia-Alcalde F, Glowinski F, Schlaermann P, Meyer TF. *Helicobacter*  
524 *pylori* infection causes characteristic DNA damage patterns in human cells. *Cell Rep.*  
525 2015;11:1703-1713.
- 526 41. Edgar R, Domrachev M, Lash AE. Gene Expression Omnibus: NCBI gene expression  
527 and hybridization array data repository. *Nucleic Acids Res.* 2002;30,207-210.
- 528 42. Robinson MD, McCarthy DJ, Smyth GK. edgeR: a Bioconductor package for  
529 differential expression analysis of digital gene expression data. *Bioinformatics.* 2010;  
530 26:139-140.
- 531 43. Maere S, Heymans K, Kuiper M. BiNGO: a Cytoscape plugin to assess  
532 overrepresentation of Gene Ontology categories in Biological Networks.  
533 *Bioinformatics.* 2005;21:3448-3449.

- 534 44. Shannon P, Markiel A, Ozier O, et al. Cytoscape: A Software Environment for  
535 Integrated Models of Biomolecular Interaction Networks. *Genome Res.*  
536 2003;13:2498-2504.
- 537 45. Szklarczyk D, Franceschini A, Wyder S, et al. STRING v10: protein–protein  
538 interaction networks, integrated over the tree of life. *Nucleic Acids Res.*  
539 2015;43:D447-452.
- 540 46. Eftang LL, Esbensen Y, Tannæs TM, Bukholm IR, Bukholm G. Interleukin-8 is the  
541 single most up-regulated gene in whole genome profiling of *H. pylori* exposed gastric  
542 epithelial cells. *BMC Microbiol.* 2012;12:9.
- 543 47. Jiang H, Zhou Y, Liao Q, Ouyang H. *Helicobacter pylori* infection promotes the  
544 invasion and metastasis of gastric cancer through increasing the expression of matrix  
545 metalloproteinase-1 and matrix metalloproteinase-10. *Exp Ther Med.* 2014;8:769-774.
- 546 48. Hewitt KJ, Agarwal R, Morin PJ. The claudin gene family: expression in normal and  
547 neoplastic tissues. *BMC Cancer.* 2006;6:186.
- 548 49. Singh AB, Dhawan P. Claudins and cancer: Fall of the soldiers entrusted to protect  
549 the gate and keep the barrier intact. *Semin Cell Dev Biol.* 2015;42:58-65.
- 550 50. Nishiguchi Y, Fujiwara-Tani R, Sasaki T, et al. Targeting claudin-4 enhances CDDP-  
551 chemosensitivity in gastric cancer. *Oncotarget,* 2019;10:2189-2202.
- 552 51. Wroblewski LE, Shen L, Ogden S, et al. *Helicobacter pylori* dysregulation of gastric  
553 epithelial tight junctions by urease-mediated myosin II activation. *Gastroenterology.*  
554 2009;136:236-246.

- 555 52. Zhang C, Zhang H, Yu L, Cao Y. *Helicobacter pylori* dwelling on the apical surface  
556 of gastrointestinal epithelium damages the mucosal barrier through direct contact.  
557 *Helicobacter*. 2014;19:330-342.
- 558 53. Wroblewski LE, Piazzuelo MB, Chaturvedi R, et al. *Helicobacter pylori* targets  
559 cancer-associated apical-junctional constituents in gastroids and gastric epithelial  
560 cells. *Gut*. 2015;64:720-730.
- 561 54. Romano M, Ricci V, Di Popolo A, et al. *Helicobacter pylori* upregulates expression of  
562 epidermal growth factor-related peptides, but inhibits their proliferative effect in  
563 MKN 28 gastric mucosal cells. *J Clin Invest*. 1998;101:1604-1613.
- 564 55. González-Mariscal L, Tapia R, Chamorro D. Crosstalk of tight junction components  
565 with signaling pathways. *Biochim Biophys Acta*. 2008;1778:729-756.
- 566 56. Ding SZ, Smith MF, Goldberg JB. *Helicobacter pylori* and mitogen-activated protein  
567 kinases regulate the cell cycle, proliferation and apoptosis in gastric epithelial cells. *J*  
568 *Gastroenterol Hepatol*. 2008;23:e67-e78.

569

## 570 Figure Legends

571 Fig.1 Cell-cell tight junction disruption and delocalization of claudin-4.

572 MKN28 cells were infected with *H. pylori* 88-3887 for 24 hours. (A) Left panel shows  
573 Epithelial barrier function of *H. pylori*-infected polarized MKN28 cells as analyzed by  
574 measuring Trans-epithelial electrical resistance (TEER). Uninfected cells served as control.  
575 Y-axis represents % baseline resistance calculated as described in the experimental methods  
576 section. Right panel shows FITC-Dextran permeability values of *H. pylori*-infected MKN28

577 cells. Uninfected cells served as control. Y-axis represents the relative fluorescence units.  
578 \*indicates p-value<0.05. (B) Confocal micrographs of 24 hr *H. pylori*-infected MKN28 cells  
579 showing delocalization of claudin-4 from the tight junctions as indicated by the white arrows  
580 (Lower panel). 3-dimensional (3D) reconstruction of images was performed using Imaris  
581 version 7.6. Uninfected cells served as control. Blue, DAPI-stained nuclei; Red, Cy3-stained  
582 claudin-4; Green, Alexaflour 488- stained *H. pylori*. (C) Western blots of membrane and  
583 cytoplasmic protein fractions of *H. pylori*-infected and uninfected MKN28 cells indicating  
584 localization of claudin-4. P-cadherin and beta-tubulin served as controls for membrane  
585 (Mem) and cytoplasmic (Cyto) fractions, respectively (upper panel). Western blots of  
586 cytoplasmic and nuclear protein fractions of *H. pylori*-infected and uninfected cells indicating  
587 localization of claudin-4 (lower panel). Beta-tubulin and Lamin A/C served as controls for  
588 cytoplasmic and nuclear fractions, respectively. The image is representative of 3 independent  
589 experiments. (D). Total protein lysate from *H. pylori*-infected and uninfected MKN28 cells at  
590 indicated time points were immunoblotted using claudin-4 antibody.  $\beta$ -actin serves as loading  
591 control for the experiment. The image is representative of 3 independent experiments (left  
592 panel). Total mRNA from *H. pylori*-infected and uninfected cells were analysed for claudin-4  
593 gene expression using qPCR. The experiment was done in triplicate and the relative  
594 quantitation are expressed as histobars (right panel). GAPDH served as the endogenous  
595 control for the experiment. UN: uninfected; WT: *H. pylori*-infected.

596 Fig.2 Effect of pretreatment with ERK activation inhibitor, U0126, on *H. pylori*-infected  
597 MKN28 cells. (A) Epithelial barrier function of *H. pylori*-infected cells with and without  
598 U0126 treatment was analyzed by measuring Trans-epithelial electrical resistance (TEER).  
599 Y-axis represents % baseline resistance calculated as described in the experimental methods  
600 section (left panel). FITC-Dextran permeability values of *H. pylori*-infected cells with and  
601 without U0126 (MEK-inhibitor) treatment were determined. \*indicates p-value<0.05. Y-axis



602 represents the relative fluorescence units (right panel). Uninfected cells with and without  
603 inhibitor served as controls. UN: uninfected, WT: wild-type *H. pylori*-infected. (B) Confocal  
604 micrographs of *H. pylori*-infected MKN28 cells with and without U0126 treatment showing  
605 localization of claudin-4. Blue, DAPI-stained nuclei; Red, Cy3-stained claudin-4. (C).  
606 Western blots of membrane and cytoplasmic protein fractions of *H. pylori*-infected cells with  
607 or without U0126 treatment indicating localization of claudin-4. (upper panel) P-cadherin and  
608 beta-tubulin served as internal controls for membrane and cytoplasmic fractions, respectively.  
609 Western blots of cytoplasmic and nuclear protein fractions of U0126 treated *H. pylori*-  
610 infected cells indicating the localization of claudin-4 (lower panel). Uninfected cells with and  
611 without inhibitor treatment served as controls. Beta-tubulin and Lamin A/C served as controls  
612 for cytoplasmic and nuclear fractions, respectively. Uninfected cells with and without  
613 inhibitor served as controls. UN: uninfected cells, WT: wild-type *H. pylori*-cells.

614 Fig.3 (A) Stacked column showing the number of significantly upregulated and  
615 downregulated genes in *H. pylori*-infected primary gastric cells. X-axis represents number of  
616 genes. (B) Scatter plot reveals the transcriptomic changes induced in *H. pylori*- infected cells.  
617 Grey dots represent genes that are not regulated by *H. pylori* whereas the blue dots represents  
618 the genes which are significantly altered in response to *H. pylori* infection. Representative  
619 dots of significantly upregulated genes are labelled on the plot. X-axis indicates the  
620 log<sub>10</sub>(RPKM) of the genes in uninfected cells (un) and Y-axis indicates the log<sub>10</sub>(RPKM) of  
621 the genes in *H. pylori*-infected cells (WT). (C) Heatmap demonstrating the RPKM values of  
622 the significantly regulated genes across replicates. The color scale depicts the log<sub>10</sub>(RPKM)  
623 starting from dark blue (lowest) to dark red (highest). The box to the left side presents  
624 examples of genes upregulated in *H. pylori*-infected cells and belonging to the indicated  
625 biological processes. UN1: Uninfected 1; UN2: Uninfected 2; WT1: *H. pylori*-infected 1;  
626 WT2: *H. pylori*-infected 2. (D) Gene Ontology analysis of genes upregulated in *H. pylori*-

627 infected cells denotes the enrichment of the indicated biological processes terms. The cell  
628 junction and MAPK cascade associated GO terms are highlighted. X-axis is the  $-\log_{10}(\text{p-}$   
629 value) of the enriched GO term. (E) Interactions among proteins that are upregulated in *H.*  
630 *pylori*-infected cells and associated with cell junction assembly and MAPK cascade are  
631 visualized using Cytoscape 3.2.0. The violet nodes depict the MAPK cascade associated  
632 genes and Orange nodes depict the cell junction assembly related genes.

**A** bioRxiv preprint doi: <https://doi.org/10.1101/2020.09.03.276600>; this version posted September 3, 2020. The copyright holder for this preprint (which was not certified by peer review) is the author/funder, who has granted bioRxiv a license to display the preprint in perpetuity. It is made available under aCC-BY-NC-ND 4.0 International license.

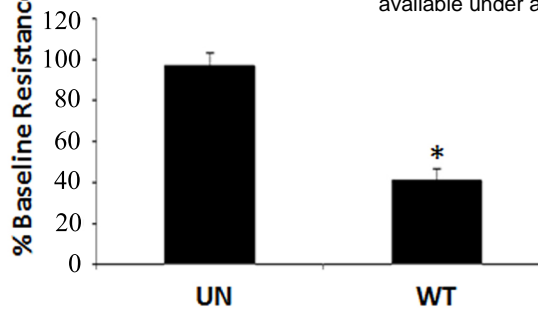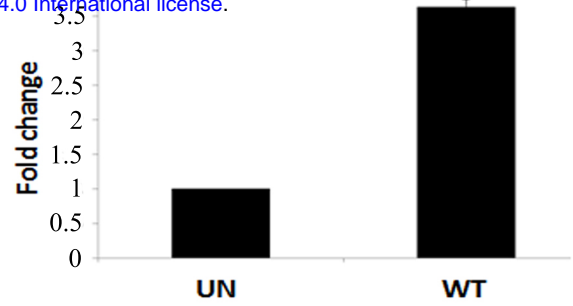

**B**

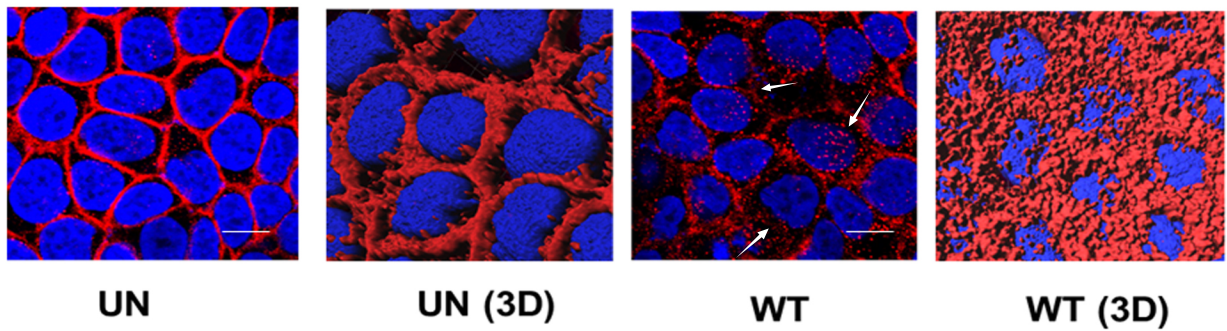

**C**

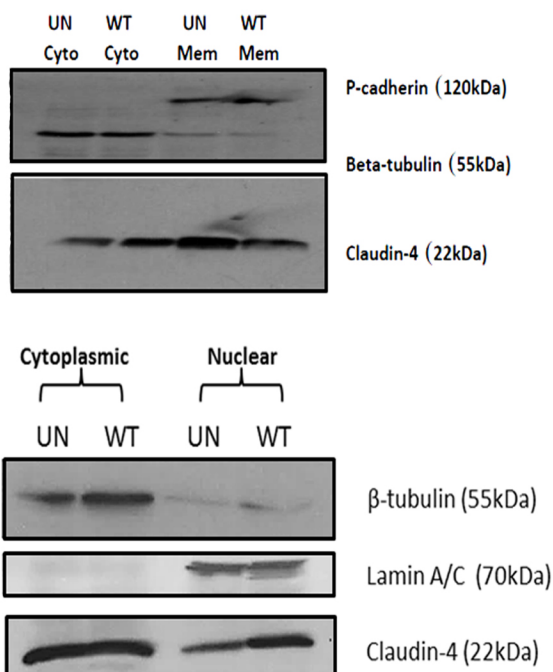

**D**

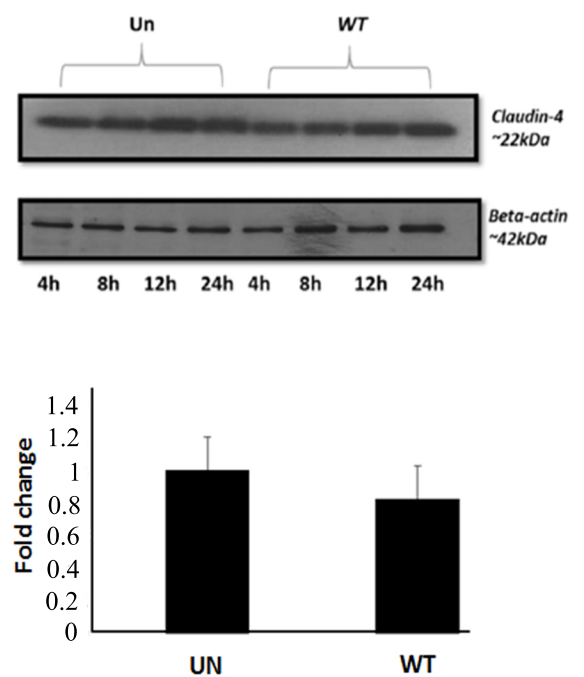

Figure 1

A  
 bioRxiv preprint doi: <https://doi.org/10.1101/2020.09.03.276600>; this version posted September 3, 2020. The copyright holder for this preprint (which was not certified by peer review) is the author/funder, who has granted bioRxiv a license to display the preprint in perpetuity. It is made available under a [CC-BY-NC-ND 4.0 International license](https://creativecommons.org/licenses/by-nc-nd/4.0/).

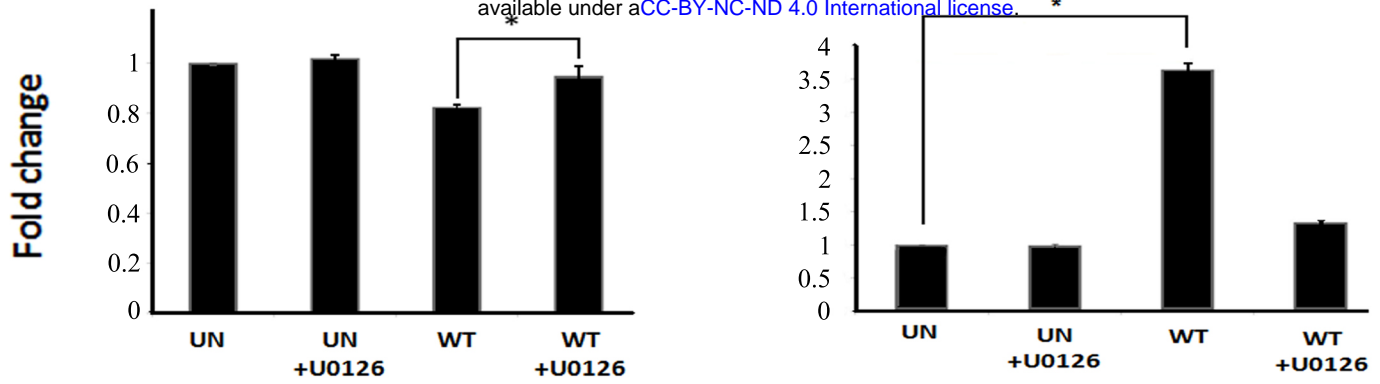

B

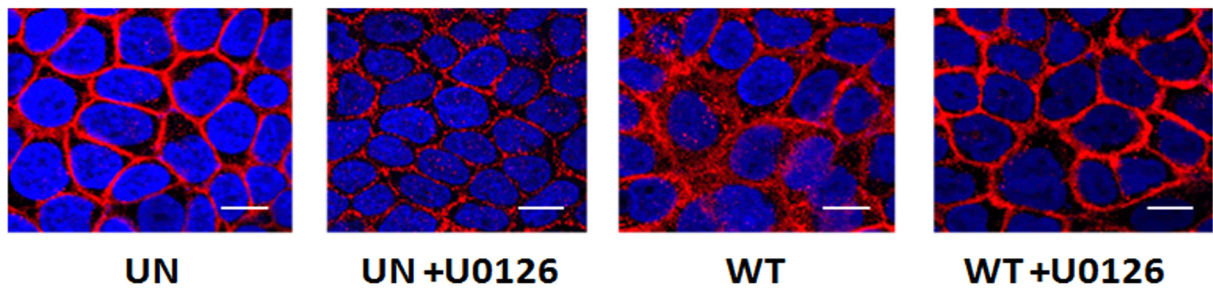

C

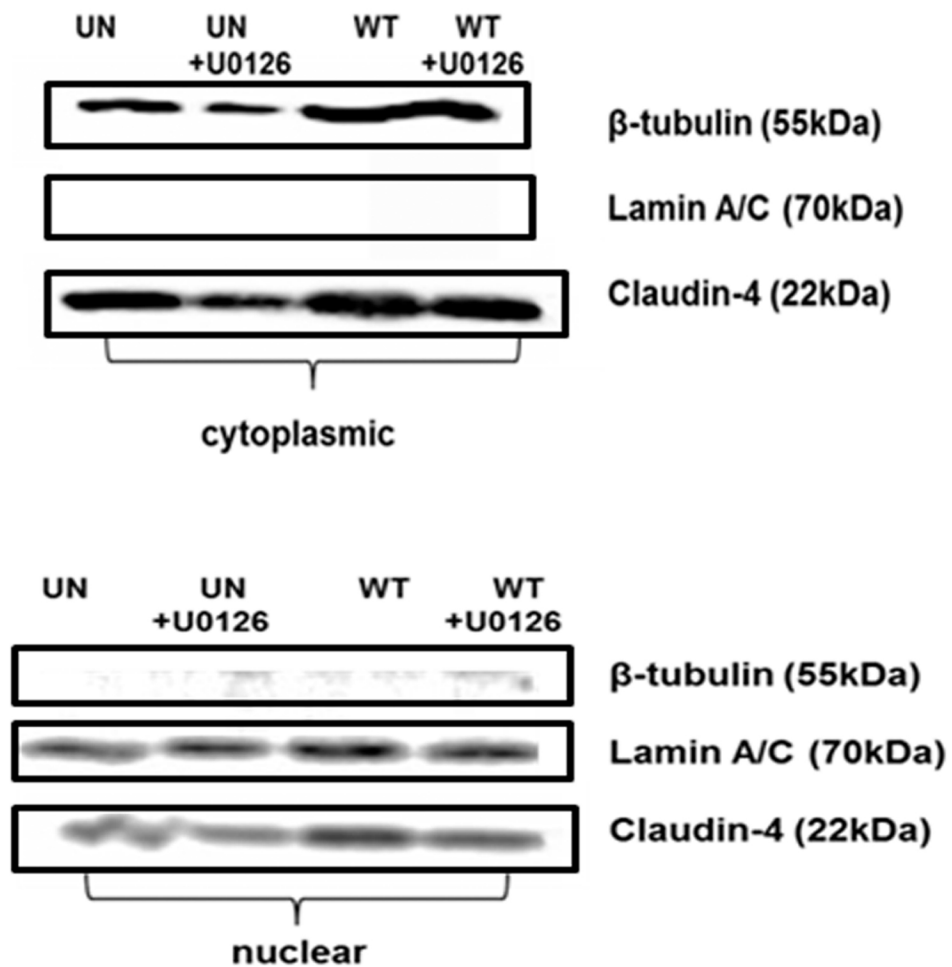

Figure 2

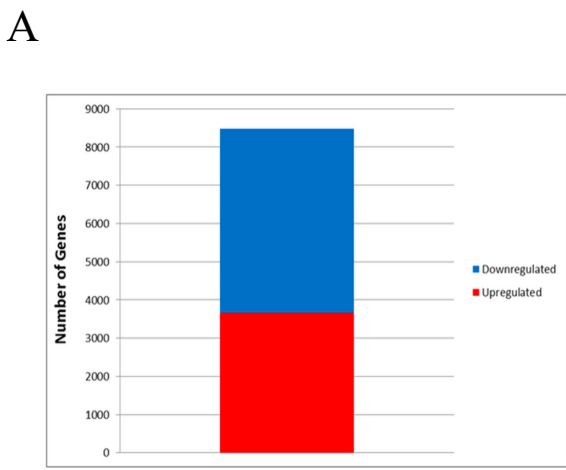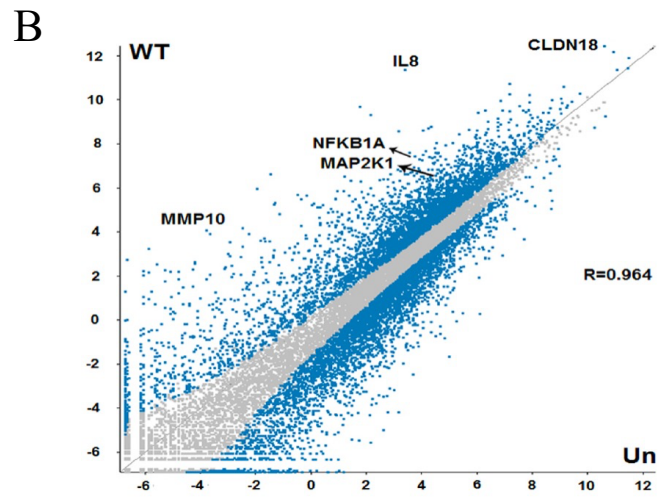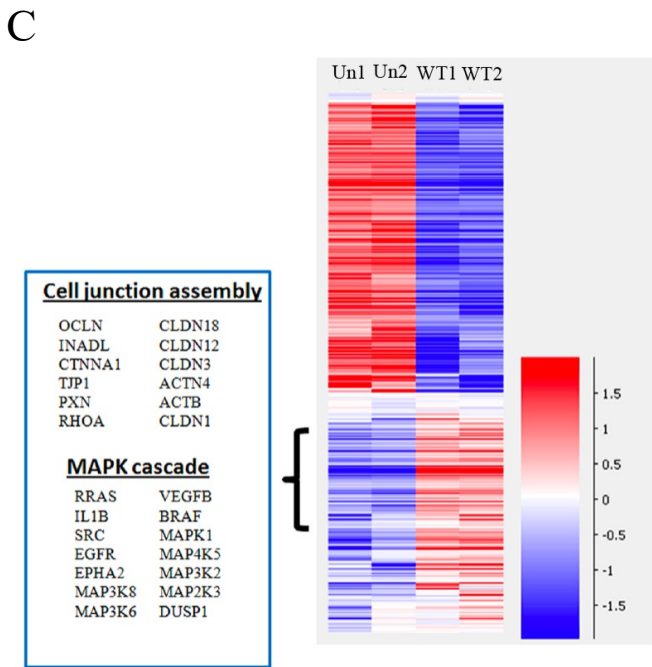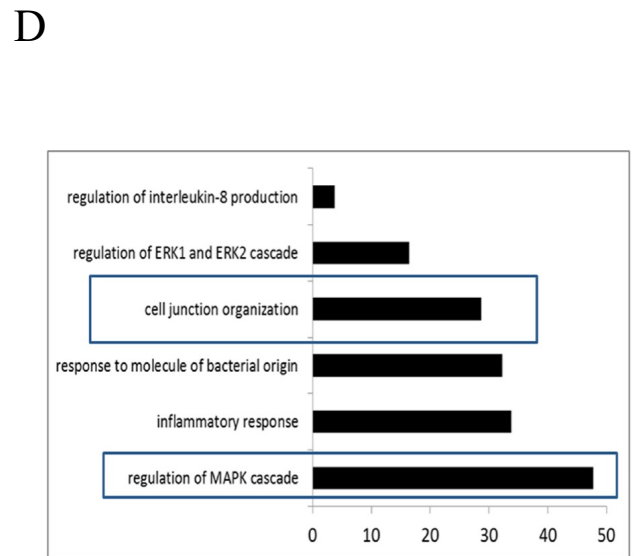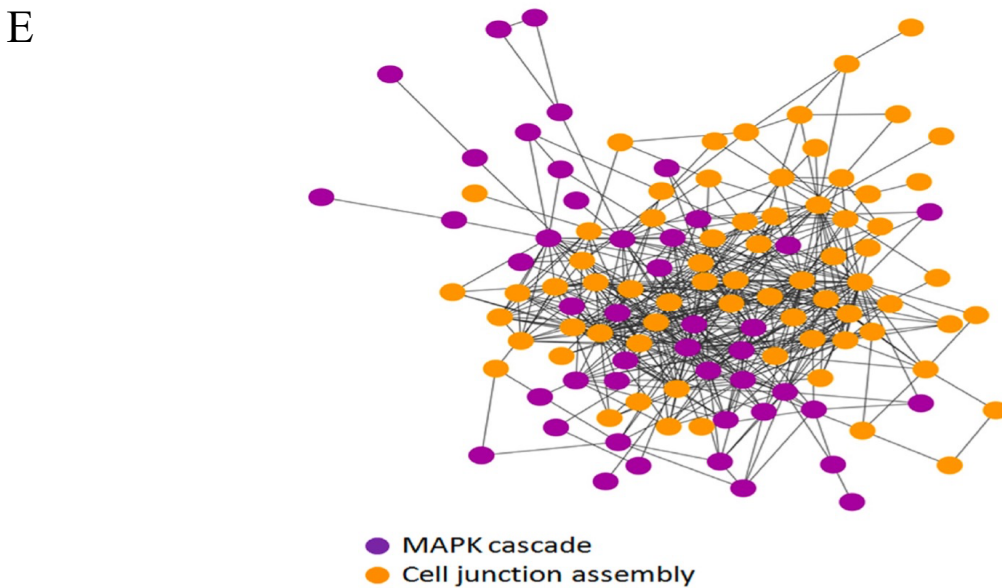

Figure 3
